# Supplementary material for: Mammalian sterile 20 kinase 1 and 2 are important regulators of hematopoietic stem cells in stress condition
Source: PubMed Central journal article supplement (PMC5772645; doi:10.1038/s41598-018-19637-y), 2018-01-17

# **Mammalian sterile 20 kinase 1 and 2 are important regulators of hematopoietic stem cells in stress condition**

Da-Hye Lee<sup>1</sup>, Tae-Shin Kim<sup>1</sup>, Dongjun Lee<sup>2,\*</sup>, Dae-Sik Lim<sup>1,\*</sup>

<sup>1</sup>Department of Biological Sciences, National Creative Research Initiatives Center, Korea Advanced Institute of Science and Technology, Daejeon, Korea

<sup>2</sup>Department of Medical Science, Pusan National University School of Medicine, Yangsan, Korea

\*Corresponding author: Dongjun Lee ([lee.dongjun@pusan.ac.kr](mailto:lee.dongjun@pusan.ac.kr)) and

Dae-Sik Lim ([daesiklim@kaist.ac.kr](mailto:daesiklim@kaist.ac.kr))

The authors declare that no conflicts of interest exist.

## Supplemental Figure 1

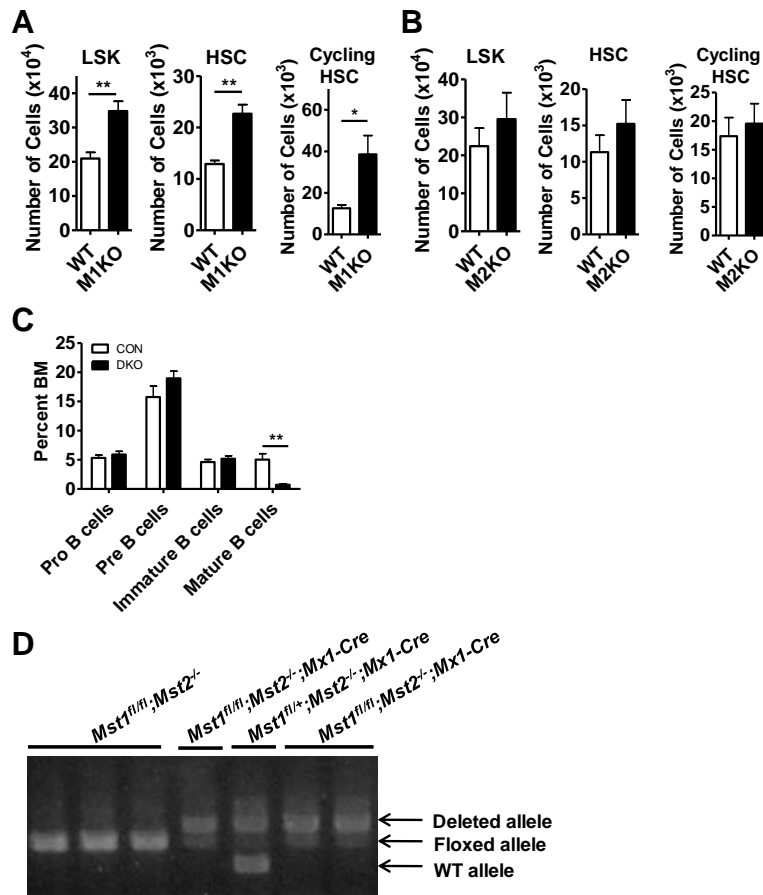

**Figure S1.** The numbers of HSCs in BM of **(A)** *Mst1*-deficient and **(b)** *Mst2*-deficient mice are shown (\* $p \leq 0.05$ , \*\* $p \leq 0.01$ ,  $n = 3-5$ ). **(C)** The frequencies of differential B cell population in the BM are shown from mice of the indicated *Mst1/2* genotypes are shown (\* $p \leq 0.05$ , \*\* $p \leq 0.01$ ,  $n = 4$ ). **(D)** PCR was performed on DNA isolated from PB to assess allele recombination from cells of the indicated genotype.

Supplemental Figure 2

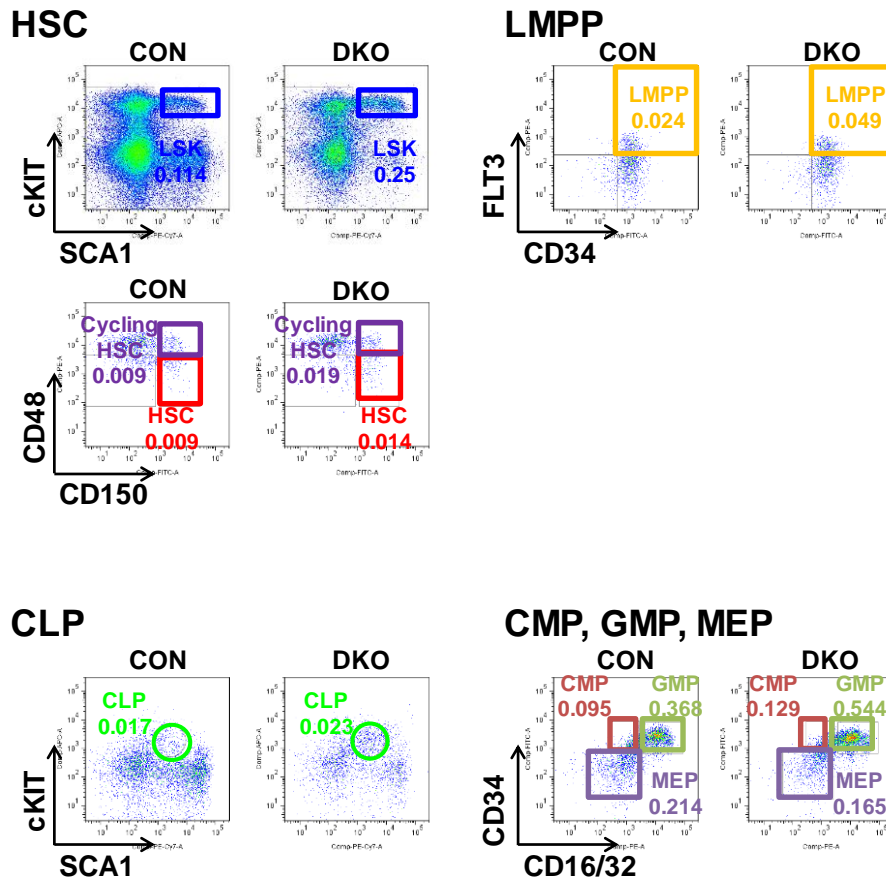

**Figure S2.** Representative FACS plots showing the frequency of LSK, HSC and cycling HSC populations.

Uncropped gel image

Supplementary figure 1D

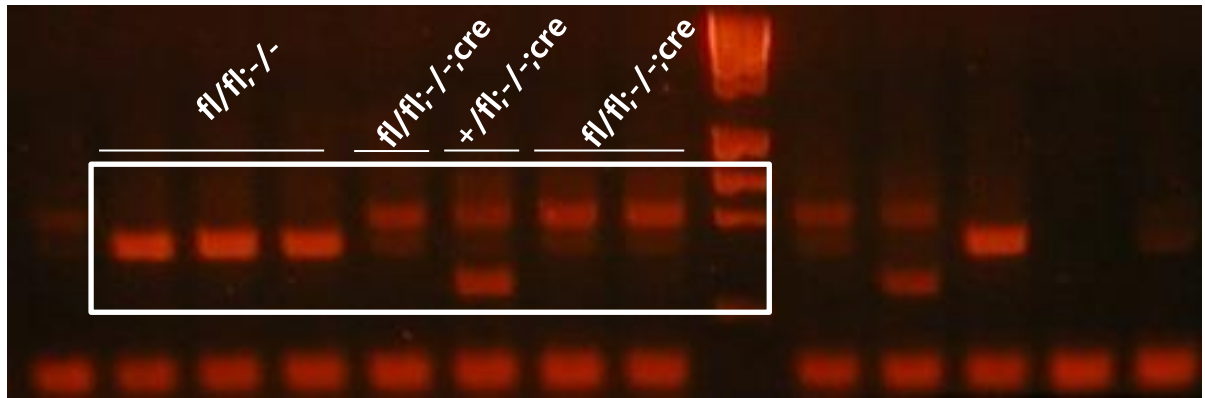

Supplement: 41598_2018_19637_MOESM1_ESM.pdf [file 41598_2018_19637_MOESM1_ESM.pdf]
